# Supplementary material
Source: publisher site journal article supplement (https://www.dovepress.com/article/520974)

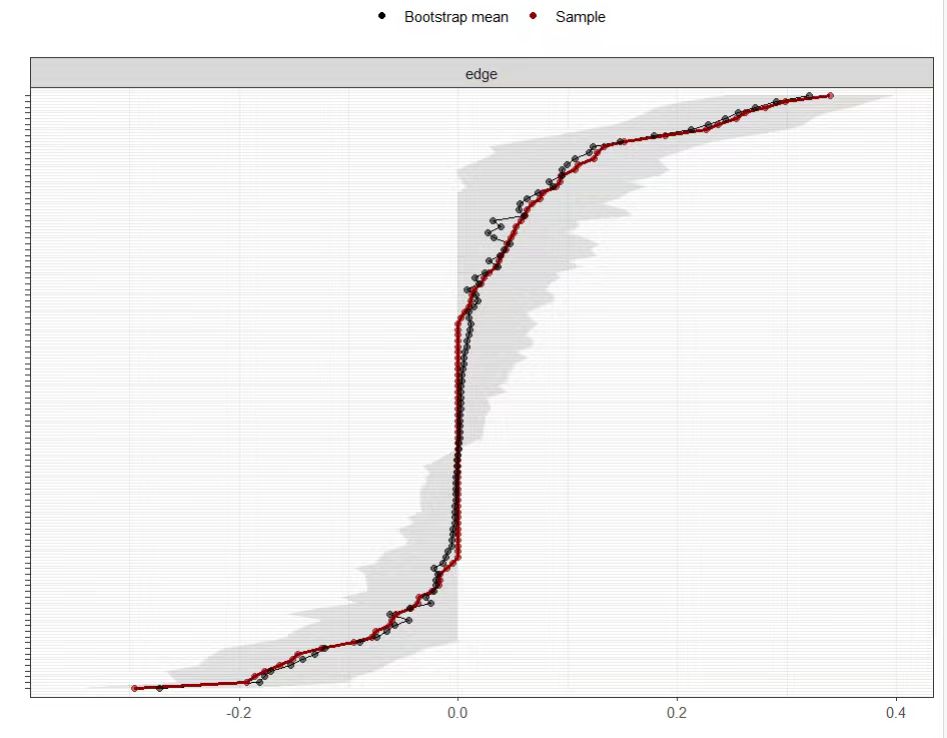


**Appendix Figure 1** **Accuracy test of side weights**


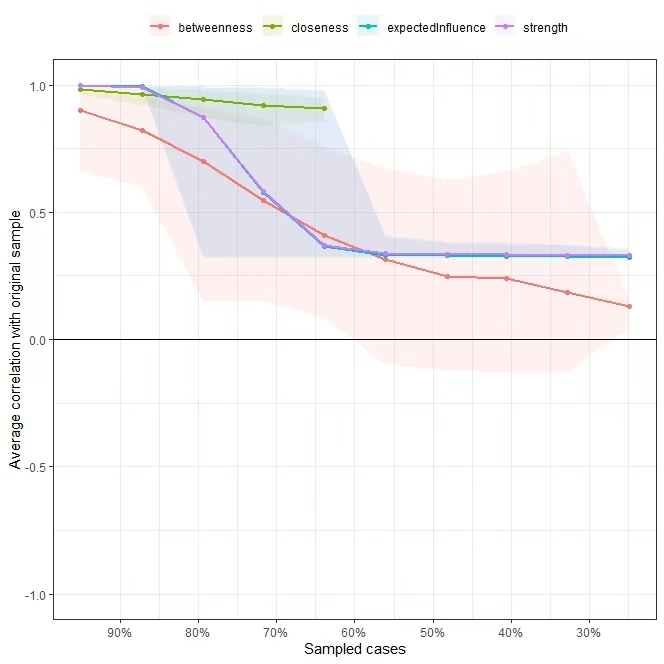


**Appendix Figure 2 Node stability test**

Supplement: Supplementary file 1 [file 520974%20Revised%20Appendix.docx]
